# Supplementary material for: Piezo1-directed neutrophil extracellular traps regulate macrophage differentiation during influenza virus infection
Source: PubMed Central journal article supplement (PMC11785962; doi:10.1038/s41419-025-07395-5), 2025-01-31
Supplement: 41419_2025_7395_MOESM2_ESM.pdf [file 41419_2025_7395_MOESM2_ESM.pdf]

**Original data of qPCR**

**Fig.3B**

|         |           |           |             |            |           |
|---------|-----------|-----------|-------------|------------|-----------|
| Exp1    |           | Tlr9      | cGas        | Sting      | Irf3      |
|         | WT        | 1         | 1           | 1          | 1         |
|         | Piezo1-/- | 0.5209552 | 0.435104734 | 0.5674416  | 0.5361045 |
|         |           |           |             |            |           |
|         |           |           |             |            |           |
| Exp2    |           | Tlr9      | cGas        | Sting      | Irf3      |
|         | WT        | 1         | 1           | 1          | 1         |
|         | Piezo1-/- | 0.6399445 | 0.524167125 | 0.64246214 | 0.6375395 |
|         |           |           |             |            |           |
|         |           |           |             |            |           |
| Exp3    |           | Tlr9      | cGas        | Sting      | Irf3      |
|         | WT        | 1         | 1           | 1          | 1         |
|         | Piezo1-/- | 0.4207694 | 0.37329522  | 0.54424074 | 0.4629273 |
|         |           |           |             |            |           |
|         |           |           |             |            |           |
| Average |           | Tlr9      | cGas        | Sting      | Irf3      |
|         | WT        | 1         | 1           | 1          | 1         |
|         | Piezo1-/- | 0.527223  | 0.444189026 | 0.58471483 | 0.5455238 |
|         |           |           |             |            |           |
| Sd      |           | Tlr9      | cGas        | Sting      | Irf3      |
|         | WT        | 0         | 0           | 0          | 0         |
|         | Piezo1-/- | 0.1097219 | 0.07584508  | 0.05133843 | 0.0876863 |

**Fig.4B**

|        |           |             |             |           |           |            |           |
|--------|-----------|-------------|-------------|-----------|-----------|------------|-----------|
| Exp1   |           | Cxcr1       | Sirt1       | Sirt2     | Hif1a     | Hif1b      | Pad4      |
|        | WT        | 1           | 1           | 1         | 1         | 1          | 1         |
|        | Piezo1-/- | 0.828144512 | 0.781869941 | 0.4337335 | 0.4789139 | 0.93066659 | 0.345139  |
| Exp2   |           | Cxcr1       | Sirt1       | Sirt2     | Hif1a     | Hif1b      | Pad4      |
|        | WT        | 1           | 1           | 1         | 1         | 1          | 1         |
|        | Piezo1-/- | 0.945040045 | 0.862404905 | 0.4964624 | 0.5193778 | 0.96851976 | 0.355685  |
| Exp3   |           | Cxcr1       | Sirt1       | Sirt2     | Hif1a     | Hif1b      | Pad4      |
|        | WT        | 1           | 1           | 1         | 1         | 1          | 1         |
|        | Piezo1-/- | 0.749543384 | 0.790584996 | 0.3704149 | 0.43567   | 0.88340346 | 0.2597257 |
| Aveage |           | Cxcr1       | Sirt1       | Sirt2     | Hif1a     | Hif1b      | Pad4      |
|        | WT        | 1           | 1           | 1         | 1         | 1          | 1         |
|        | Piezo1-/- | 0.840909314 | 0.811619947 | 0.4335369 | 0.4779872 | 0.92752994 | 0.3201832 |
| SD     |           | Cxcr1       | Sirt1       | Sirt2     | Hif1a     | Hif1b      | Pad4      |
|        | WT        | 0           | 0           | 0         | 0         | 0          | 0         |
|        | Piezo1-/- | 0.098371446 | 0.044196402 | 0.063024  | 0.0418616 | 0.04264476 | 0.0526226 |

**Fig.5C**

| PAD4   |         |          |  |          |         |          |  |
|--------|---------|----------|--|----------|---------|----------|--|
|        |         | Exp1     |  | Exp2     |         | Exp3     |  |
|        | WT-Veh  | 1        |  | 1        |         | 1        |  |
|        | KO-Veh  | 0.352915 |  | 0.380894 |         | 0.324916 |  |
|        | WT-Ruth | 0.956607 |  | 1.046023 |         | 0.763918 |  |
|        | KO-Ruth | 0.419681 |  | 0.340638 |         | 0.467699 |  |
|        |         |          |  |          |         |          |  |
|        |         |          |  |          |         |          |  |
|        |         |          |  |          |         |          |  |
| Aveage |         | SD       |  |          |         |          |  |
|        | WT-Veh  | 1        |  |          | WT-Veh  | 0        |  |
|        | KO-Veh  | 0.352908 |  |          | KO-Veh  | 0.027989 |  |
|        | WT-Ruth | 0.922183 |  |          | WT-Ruth | 0.144169 |  |
|        | KO-Ruth | 0.409339 |  |          | KO-Ruth | 0.064159 |  |

**Western blot of uncropped images of whole membranes**

Fig.1D

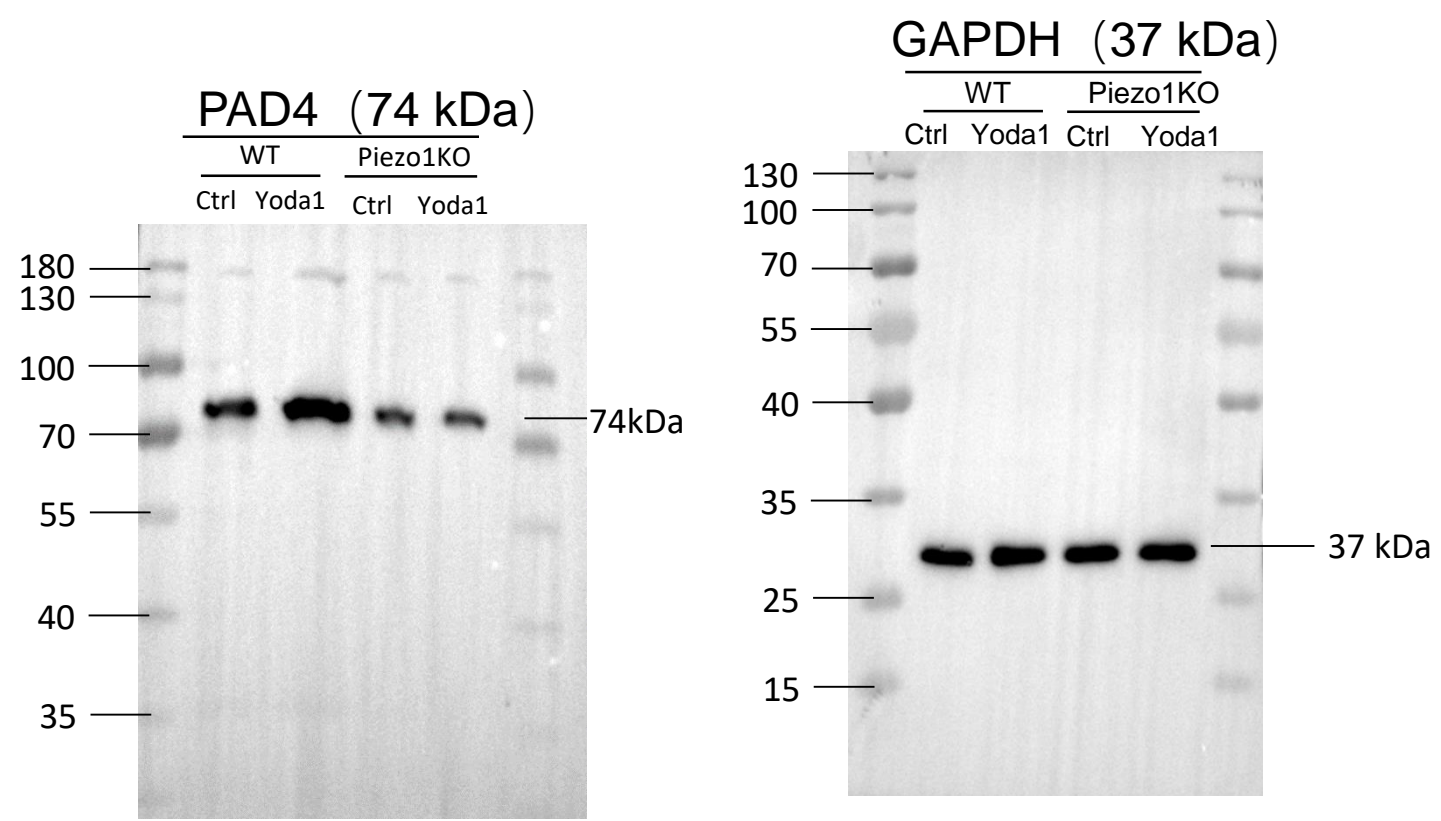

Fig.3C

Western blot  
Organ: lung

Sting (40 kDa)

WT *Piezo1*<sup>-/-</sup>

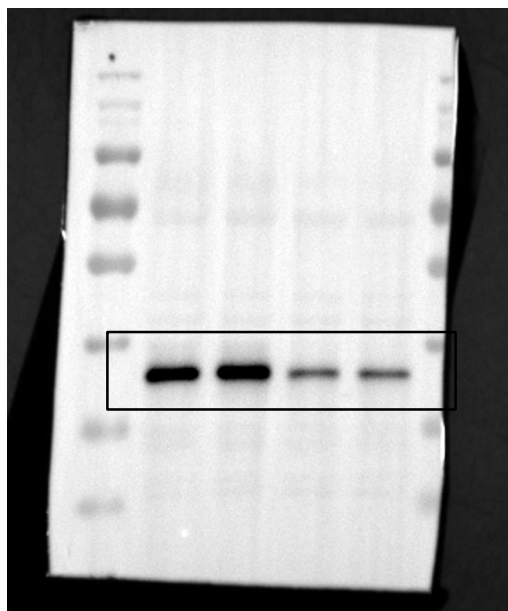

IRF3 (50 kDa)

WT *Piezo1*<sup>-/-</sup>

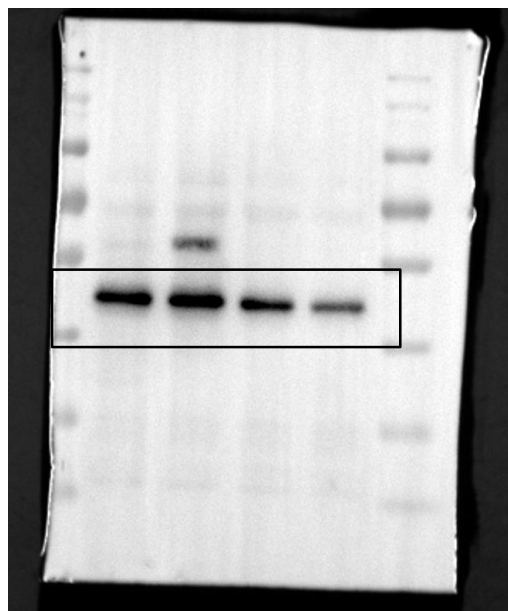

$\beta$ -actin (42 kDa)

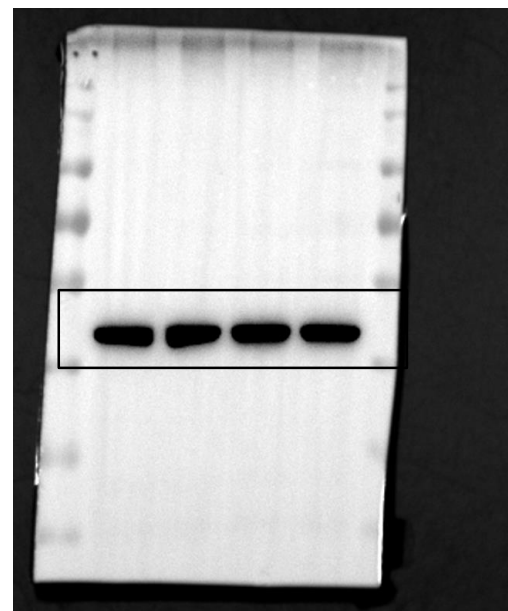

**Fig.4C**

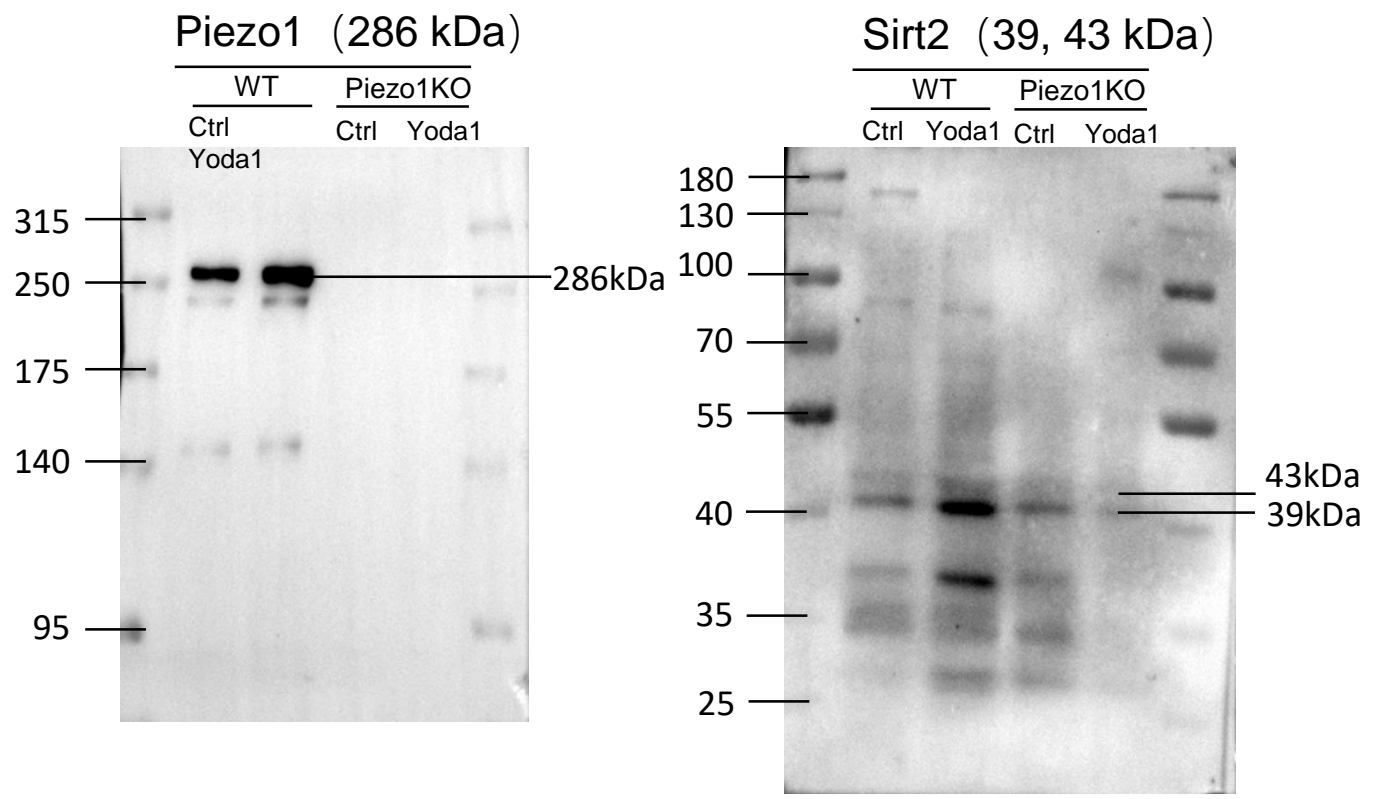



Fig.4C

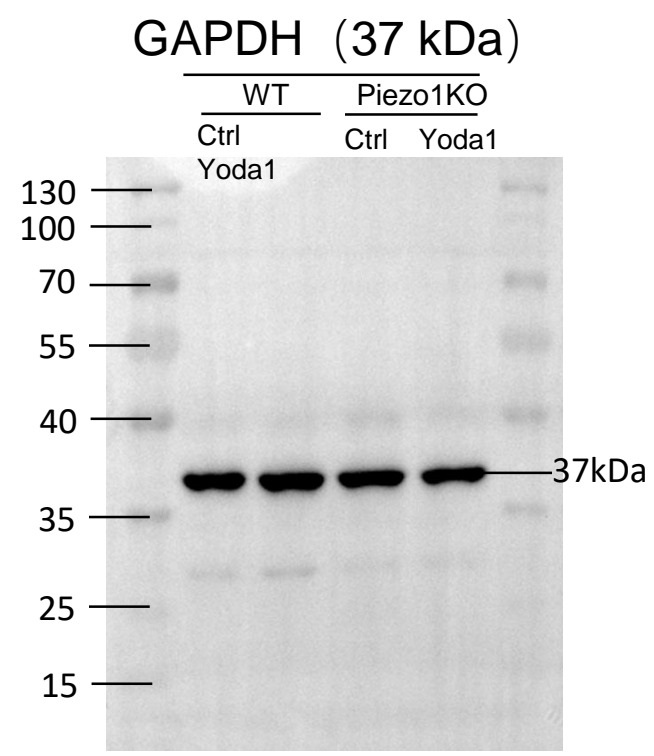

Fig.4G

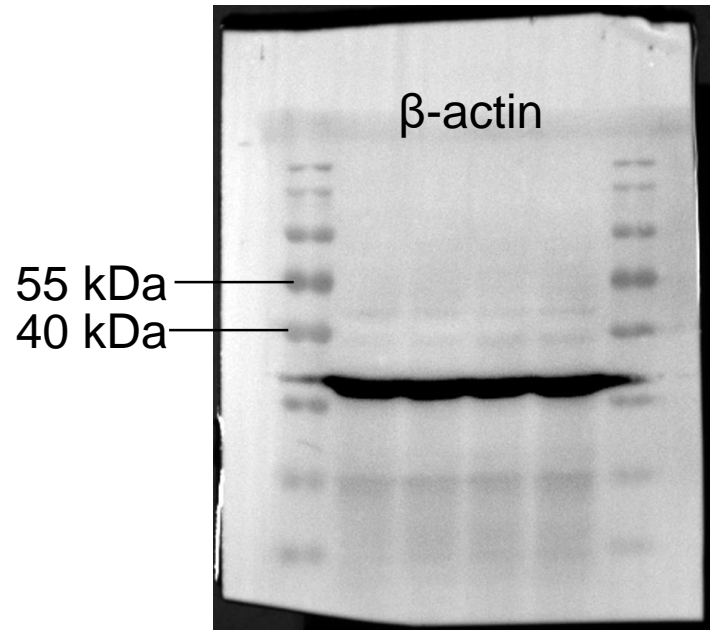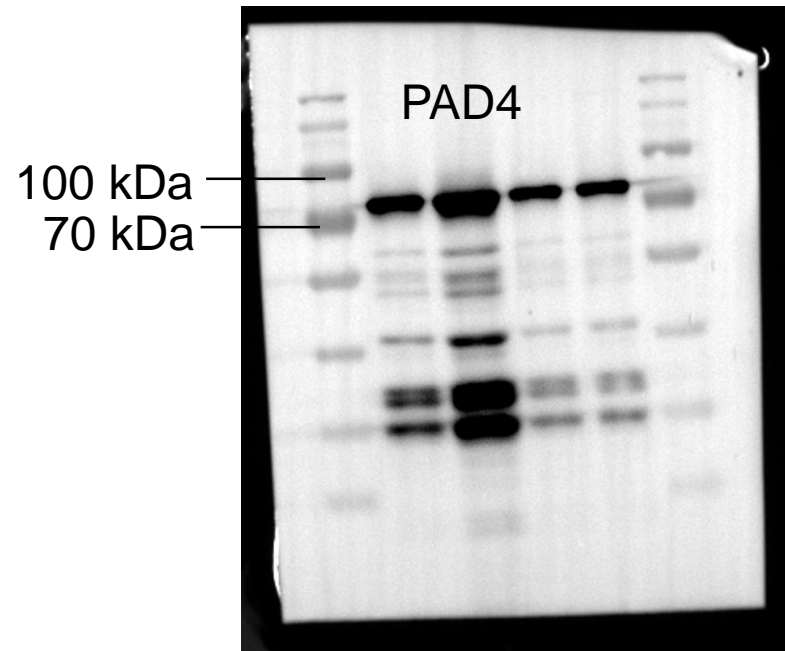

Fig.5G

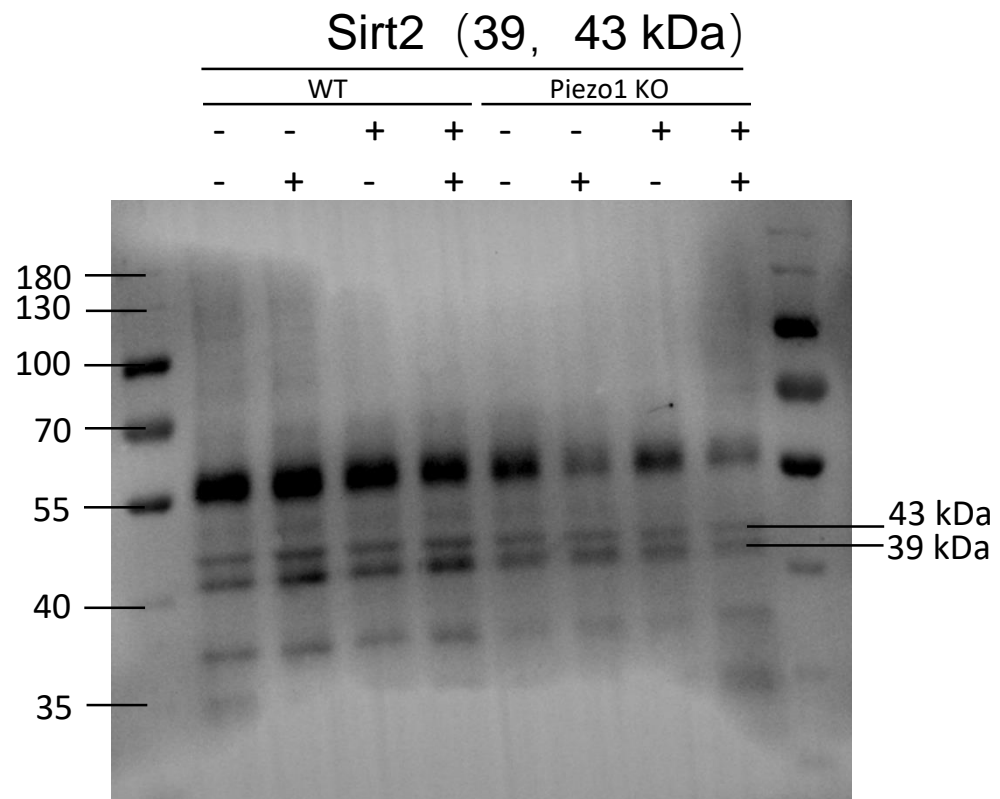

Fig.5G

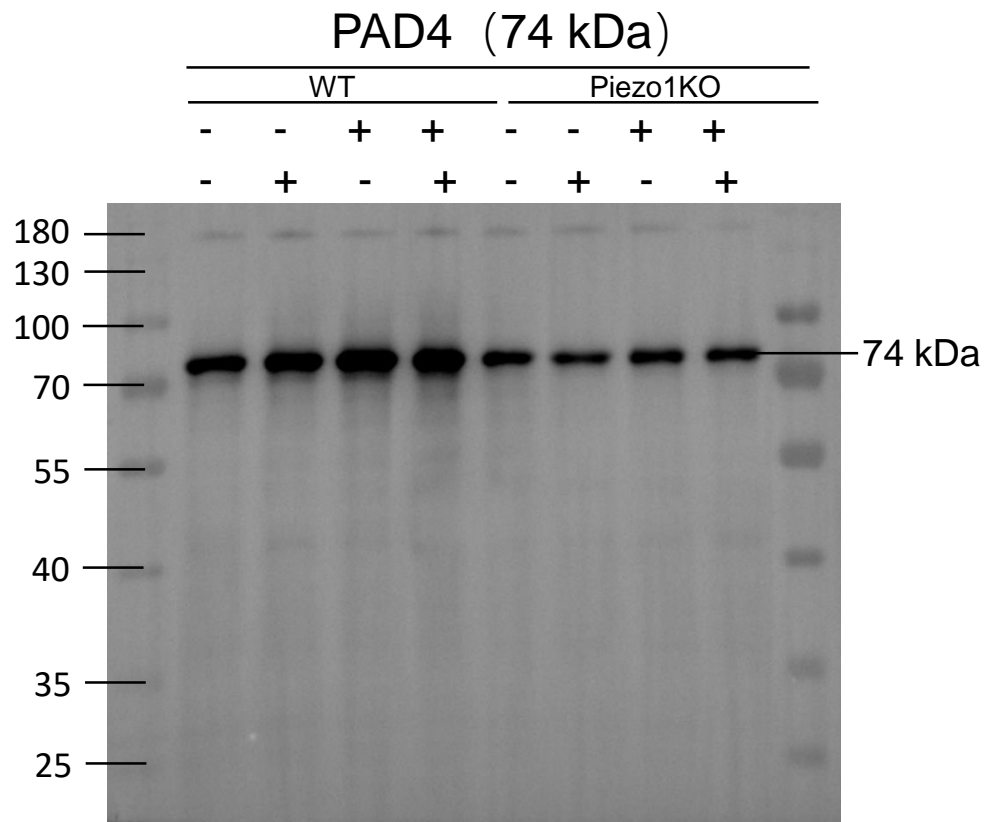

Fig.5G

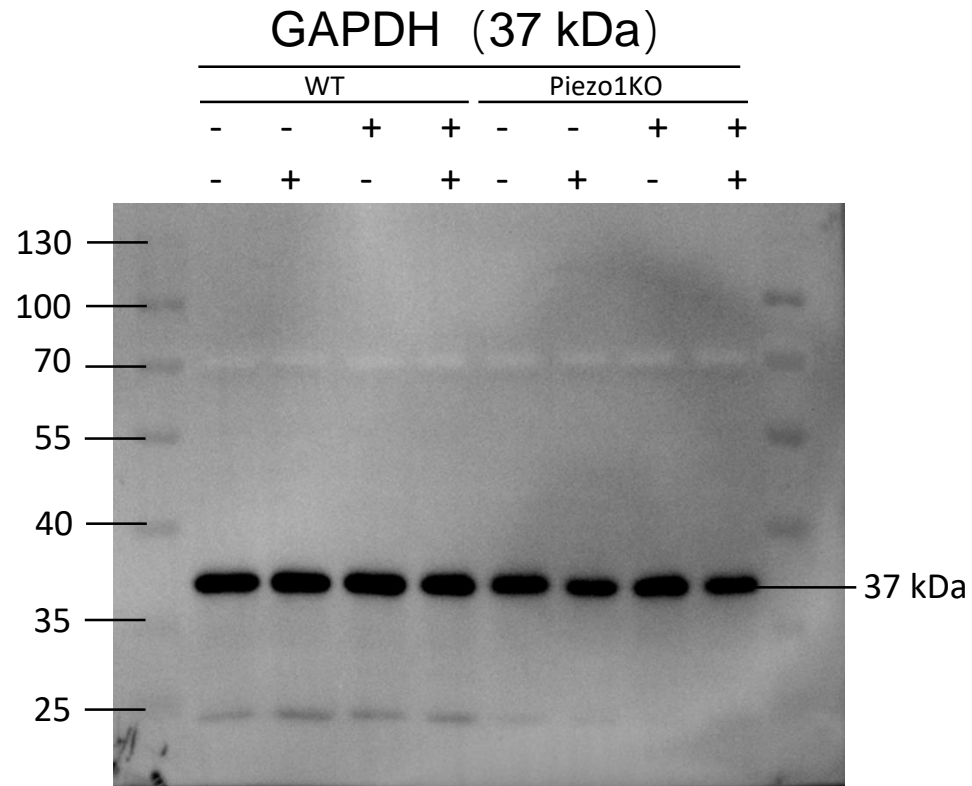

**Fig.7C**

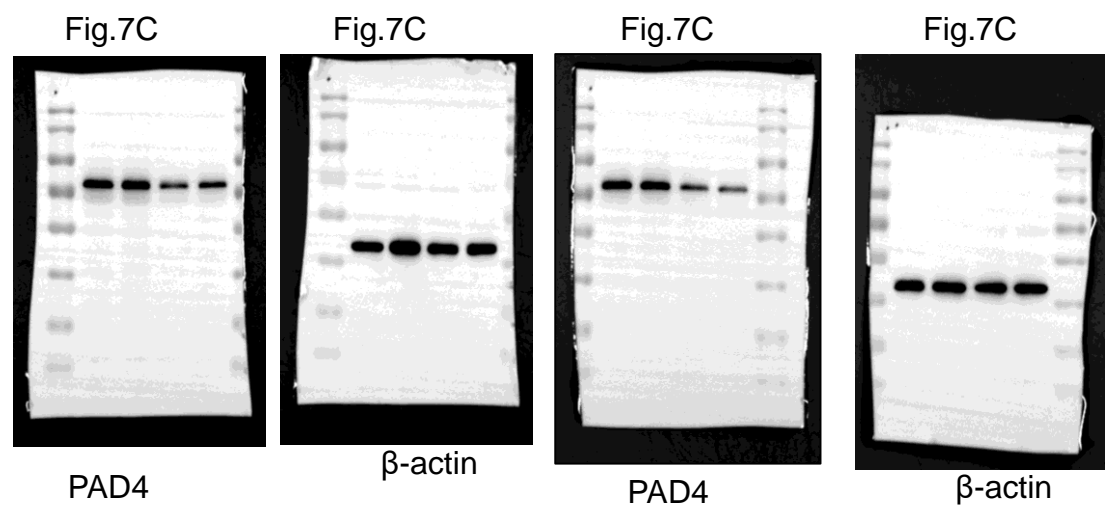

Fig.S2E

$\beta$ -Actin

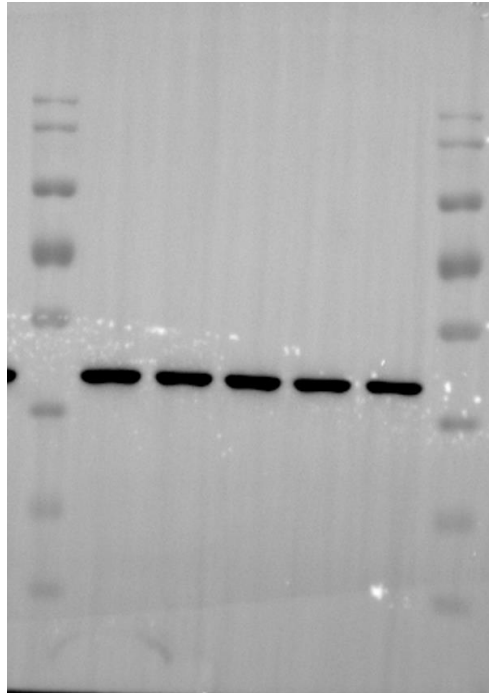

PAD4

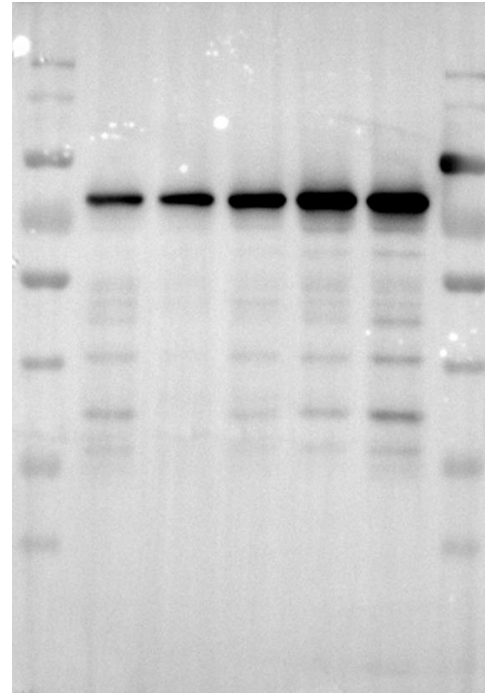

Fig.S4C

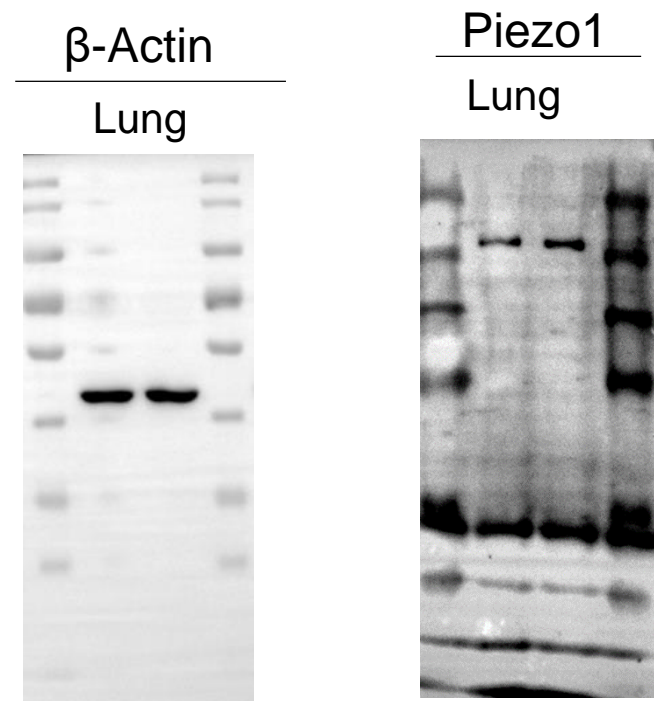



Fig.S6C

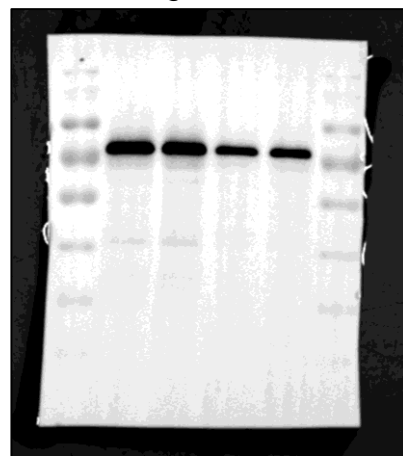

PAD4

Fig.S6C

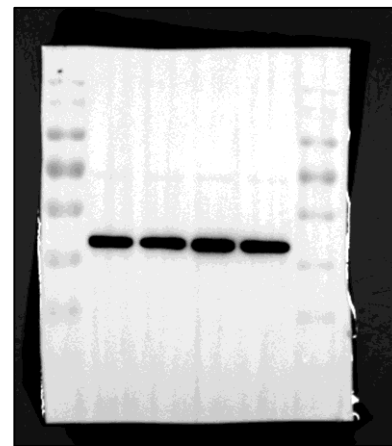

$\beta$ -actin

Fig.S11A

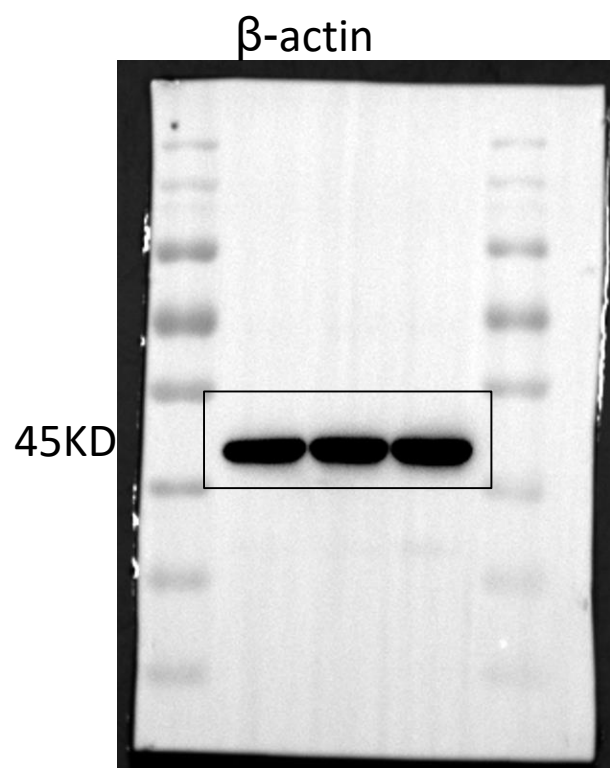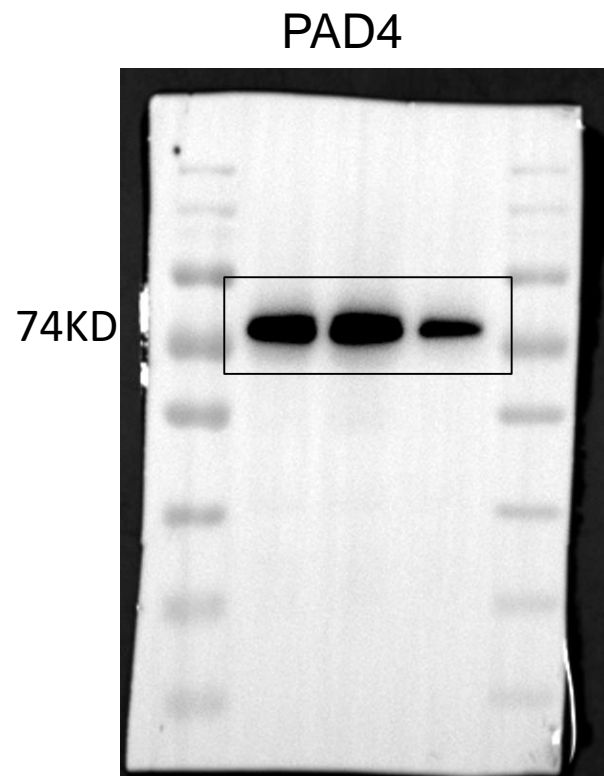

Fig.S14C

$\beta$ -actin

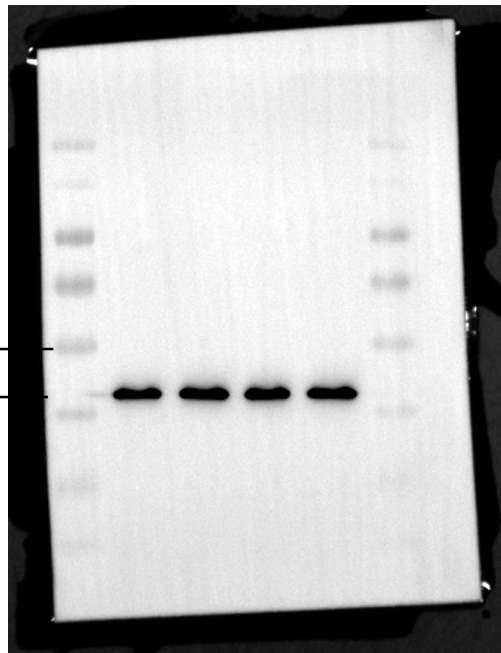

55 kDa  
40 kDa

PAD4

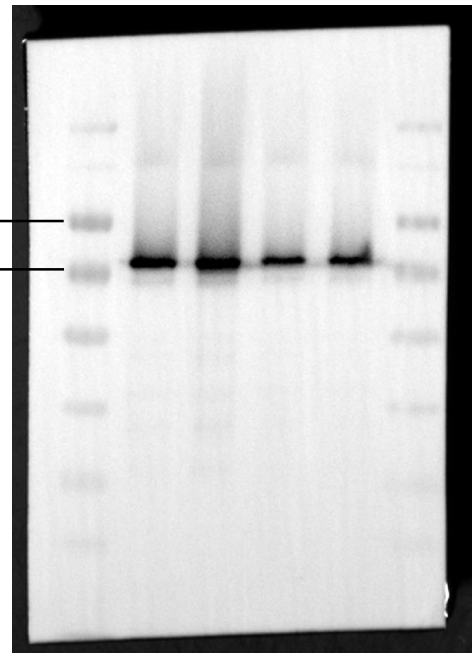

100 kDa  
70 kDa
